# Supplementary material for: A-year Continuous Observations of Near-Surface Atmospheric Water Vapor Stable Isotopes at Matara, Sri Lanka
Source: Copernicus journal article supplement (doi:10.5194/egusphere-2024-1840), 2024-08-05
Supplement: Supplementary file 1 [file egusphere-2024-1840-supplement.pdf]

1           **A-year Continuous Observations of Near-Surface Atmospheric**  
2                           **Water Vapor Stable Isotopes at Matara, Sri Lanka**

3   Yuqing Wu <sup>1,2</sup>, Jing Gao <sup>1,3,\*</sup>, Aibin Zhao <sup>1</sup>, Xiaowei Niu <sup>1</sup>, Yigang Liu <sup>1</sup>,  
4       <sup>2</sup>, Disna Ratnasekera <sup>4,5</sup>, Tilak Priyadarshana Gamage <sup>6</sup>, Amarasinghe  
5                                           Hewage Ruwan Samantha <sup>6</sup>

6   *1 State Key Laboratory of Tibetan Plateau Earth System, Resources and Environment,*  
7   *Institute of Tibetan Plateau Research, Chinese Academy of Sciences, Beijing 100101,*  
8   *China*

9   *2 University of Chinese Academy of Sciences, Beijing, 100049, China*

10 *3 Lanzhou University, Lanzhou 733000, China*

11 *4 China-Sri Lanka Joint Center for Education & Research, Guangzhou 510301,*  
12 *China*

13 *5 Department of Agricultural Biology, Faculty of Agriculture, University of Ruhuna,*  
14 *Matara 81000, Sri Lanka*

15 *6 Faculty of Fisheries and Marine Sciences & Technology, University of Ruhuna,*  
16 *Matara 81000, Sri Lanka*

17 *\* Corresponding to: Jing Gao ([gaojing@itpcas.ac.cn](mailto:gaojing@itpcas.ac.cn))*

18

## 19 **Text S1 Calibration of the water vapor isotopic analyzer**

20 Measurements of water vapor isotopic composition by the Los Gatos Research  
21 (LGR) analyzer are not used directly but the instrument needs to be calibrated as  
22 the measurements are affected by internal and external conditions of the LGR analyzer,  
23 hence the measured values cannot simply be corrected with standard samples. The  
24 following factors can affect measurement accuracy: concentration changes,  
25 instrumental effects, and drift effects (Benetti et al., 2014; Johnson et al., 2011).  
26 Measurements of water vapor stable isotope values become inconsistent when  
27 measured under different water vapor concentrations. The result is correlated to water  
28 vapor concentration (either linearly or non-linearly), which is the so-called  
29 concentration-dependent effect (Steen-Larsen et al., 2013). In addition, minor  
30 variations in the inherent characteristics of each stable isotope analyzer led to disparities  
31 between measured and “true” isotope values, a phenomenon referred to as instrumental  
32 effect. When an analyzer is in continuous operation, optical components experience  
33 aging, including a reduction in the reflectivity of cavity mirrors. These factors  
34 collectively contribute to instrument drift (Bailey et al., 2015; Rambo et al., 2011).

35 As the magnitude of these drift effects vary between analyzers, it is crucial to  
36 evaluate and correct these errors using standard samples. In our study, we followed the  
37 calibration protocol from Steen-Larsen et al. (2013).

### 38 **Text S1.1 Humidity correction**

39 The humidity measurements obtained from the LGR analyzer (absolute humidity  
40 in ppmv) are compared to humidity values calculated from the automated weather

41 station (AWS) measurements (calculated from relative humidity and temperature) in

42 Fig. S1. The best linear fit is given by a function:

$$y = (1.03 \pm 0.003) x + (-288.67 \pm 41.46) \quad (r = 0.97, n = 6349) \quad (S1)$$

43 where x is the LGR and y is the AWS humidity values (in ppmv), respectively.

44 Equation (S1) is hereafter used to convert all LGR humidity data into the

45 meteorological instrument scale.

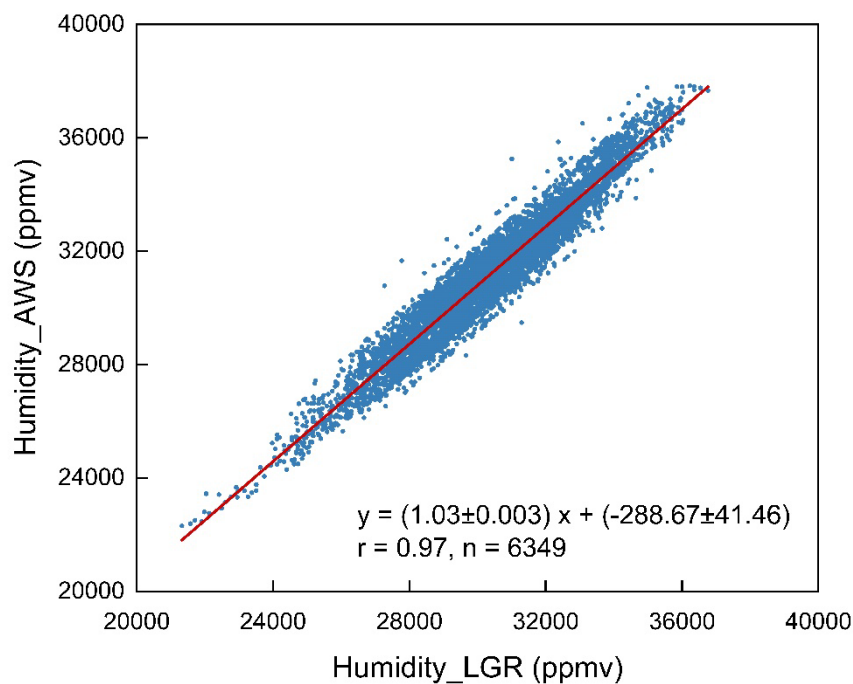

46

47 **Figure S1: Humidity measurements: Meteorological sensor vs. LGR**  
48 **measurements. The red line represents the linear fit.**

### 49 **Text S1.2 Humidity-isotope response calibration**

50 A memory effect manifests when standard samples of differing concentrations are

51 being tested in the host system's testing chamber as remnants of a previous sample may

52 remain in the testing chamber and introduce a discernible contamination of

53 measurements of subsequent samples. During standard sample testing, we performed a

54 25- or 30-minute test for each gradient. While filtering the measured isotope standard

55 sample data, the initial 10 or 15 minutes and the last 30 seconds of each standard sample  
56 segment were eliminated.

57 When conducting field observations, whether on a daily or seasonal basis, there is  
58 always a substantial fluctuation in water vapor concentrations. The errors resulting from  
59 concentration effects are incomparable to other factors. In our measurements,  
60 concentration calibration was performed monthly.

61 Based on previous research (Steen-Larsen et al., 2013; Steen-Larsen et al., 2015;  
62 Ritter et al., 2016), we chose 20,000 ppmv as the reference water vapor concentration,  
63 based on the assumption that isotope concentration effects are minimal under this  
64 standard. Our objective was to calculate the stable isotope mean values at this reference  
65 concentration. Given the generally high values of water vapor concentration at Matara  
66 station, we conducted the measurement of isotopic values for standard samples at a  
67 range of water vapor concentration from 16,000 to 38,000 ppmv using increments of  
68 1,000 ppmv. We excluded measurements with average H<sub>2</sub>O below 13,000 ppmv or  
69 higher 40,000 ppmv and standard deviations of H<sub>2</sub>O,  $\delta^{18}\text{O}$ , and  $\delta\text{D}$  (denoted as  $\Delta(\text{H}_2\text{O})$ ,  
70  $\Delta(\delta^{18}\text{O})$ ,  $\Delta(\delta\text{D})$ , respectively) higher than 200 ppmv, 0.2‰, and 1‰, respectively.  
71 Subsequently, we calculated the disparities between the average isotopic values at  
72 20,000 ppmv water vapor concentration and the measurements of standard samples  
73 under various concentration gradients to establish a nonlinear relationship between  
74 isotope values and water vapor concentration (Fig. S2). It has been proven that  
75 polynomial functions yield the most effective fit to LGR analyzer data. The fit curve  
76 equations for hydrogen and oxygen stable isotope data, as well as for water vapor

77 concentration, were then applied to correct the concentrations obtained from actual  
78 measurements of atmospheric water vapor.

79 The calculation to correct for concentration effects can be expressed using the  
80 following formula:

$$\delta_{\text{Humidity correction vs. reference level}} = \delta_{\text{Humidity-isotope response}} (c(\text{H}_2^{16}\text{O}_{\text{ppmv}})) \quad (\text{S2})$$

$$\delta_{\text{Measured humidity-correction to reference level}} = \delta_{\text{Measured}} - \delta_{\text{Humidity correction vs. reference level}} \quad (\text{S3})$$

81 where  $\delta_{\text{Measured}}$  represents the raw measurement and  $\delta_{\text{Humidity-isotope response}}$  is the humidity-  
82 isotope response function defining the difference between the measured and true  
83 isotopic composition for a reference (20,000 ppmv) vapor introduced at different  
84 humidity levels.

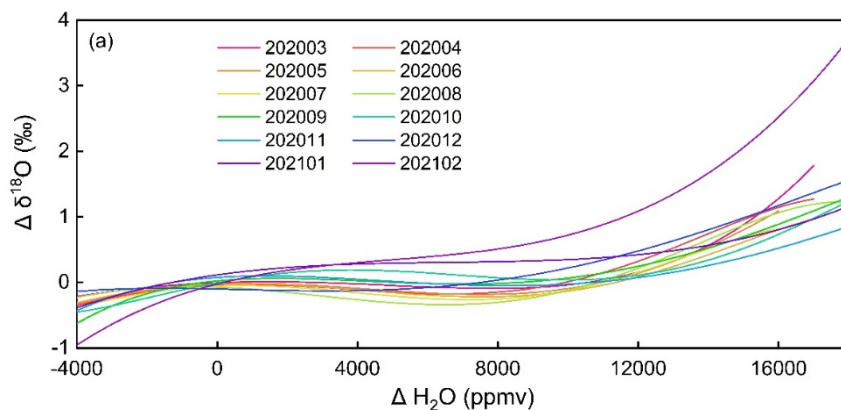

85

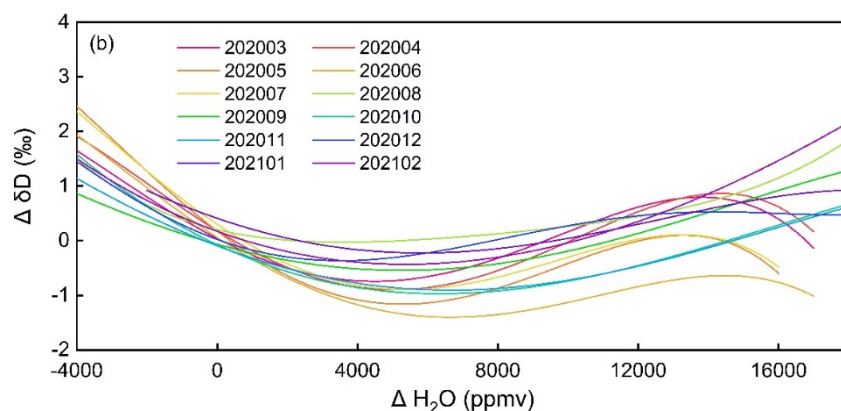

86

87 **Figure S2: Water vapor concentration dependent correction curves between  $\Delta$**   
 88 **( $H_2O$ ) and (a)  $\Delta (\delta^{18}O)$  and (b)  $\Delta (\delta D)$  for the standard samples at Matara station,**  
 89 **covering the period from March 2020 to February 2021. Different colors identify**  
 90 **different months (using the yyyy-mm notation).**

91 **Text S1.3 Known-standard calibration**

92 Each LGR analyzer has its own unique characteristics, which lead to differences  
 93 between measured and actual isotope values. To correct these measurements errors  
 94 caused by instrument bias, it is imperative to create a conversion function connecting  
 95 instrument results ( $\delta^{18}O$  and  $\delta D$ ) with the Vienna Standard Mean Ocean Water -  
 96 Standard Light Antarctic Precipitation (VSMOW-SLAP) standard. It is essential to  
 97 have a minimum of two or more standard samples with known isotope compositions to

98 establish a linear functional relationship. The formula for the linear relationship used in  
 99 the VSMOW-SLAP calibration is as follows:

$$\frac{\delta_{st2\_true} - \delta_{st1\_true}}{\delta_{st2\_mean\_ref} - \delta_{st1\_mean\_ref}} = \frac{\delta_{humidity\_VSMOW\_correction} - \delta_{st1\_true}}{\delta_{humidity\_correction} - \delta_{st1\_mean\_ref}} \quad (S4)$$

$$\begin{aligned} &\delta_{humidity\_VSMOW\_correction} \\ &= \frac{(\delta_{st2\_true} - \delta_{st1\_true}) * (\delta_{humidity\_correction} - \delta_{st1\_mean\_ref})}{\delta_{st2\_mean\_ref} - \delta_{st1\_mean\_ref}} \quad (S5) \\ &+ \delta_{st1\_true} \end{aligned}$$

100  $\delta_{st1\_true}$  and  $\delta_{st2\_true}$  are the true values of standards st1 and st2.  $\delta_{st1\_mean\_ref}$  and  
 101  $\delta_{st2\_mean\_ref}$  is the measured values of standards st1 and st2, which have been humidity  
 102 corrected to a reference level following formulas (S2) and (S3).

103 Two standard samples were tested at different concentration gradients (ranging  
 104 from 16,000 to 38,000 with increments of 1,000) for either 25 or 30 minutes on the  
 105 same day each month. When inspecting and screening the test data, we manually  
 106 eliminated potential data anomalies to ensure that the standard deviations for H<sub>2</sub>O,  $\delta^{18}\text{O}$ ,  
 107 and  $\delta\text{D}$  of valid data within each concentration gradient remained below 200 ppmv,  
 108 0.2‰, and 1‰, respectively.

#### 109 **Text S1.4. Drift correction**

110 The double-inlet mode of the LGR analyzer allows alternate measurements of  
 111 ambient water vapor and reference water, effectively correcting for the assumed linear  
 112 drift between measurements and reference waters. Measurements were taken using 12-  
 113 hour intervals, and concentration-dependent calibration and instrumental bias  
 114 correction were performed daily. Drift is corrected using the following equation:

$$\delta_{\text{drift corrected VSMOW}} = \delta_{\text{st1}_t1} \times T + \delta_{\text{st1}_t2} \times (1 - T) - \delta_{\text{st1\_true}} \quad (\text{S6})$$

$$\delta_{\text{measured VSMOW drift corrected}} = \delta_{\text{measured VSMOW}} - \delta_{\text{drift corrected VSMOW}} \quad (\text{S7})$$

115        where  $T = \frac{t-t_1}{t_2-t_1}$ , and  $t_1$  and  $t_2$  are the respective times when  $\delta_{\text{st1}_t1}$  and  $\delta_{\text{st1}_t2}$  were  
116 measured for the water vapor standard samples.  $\delta_{\text{st1\_true}}$  is the true value of the water  
117 used to produce the vapor stream.



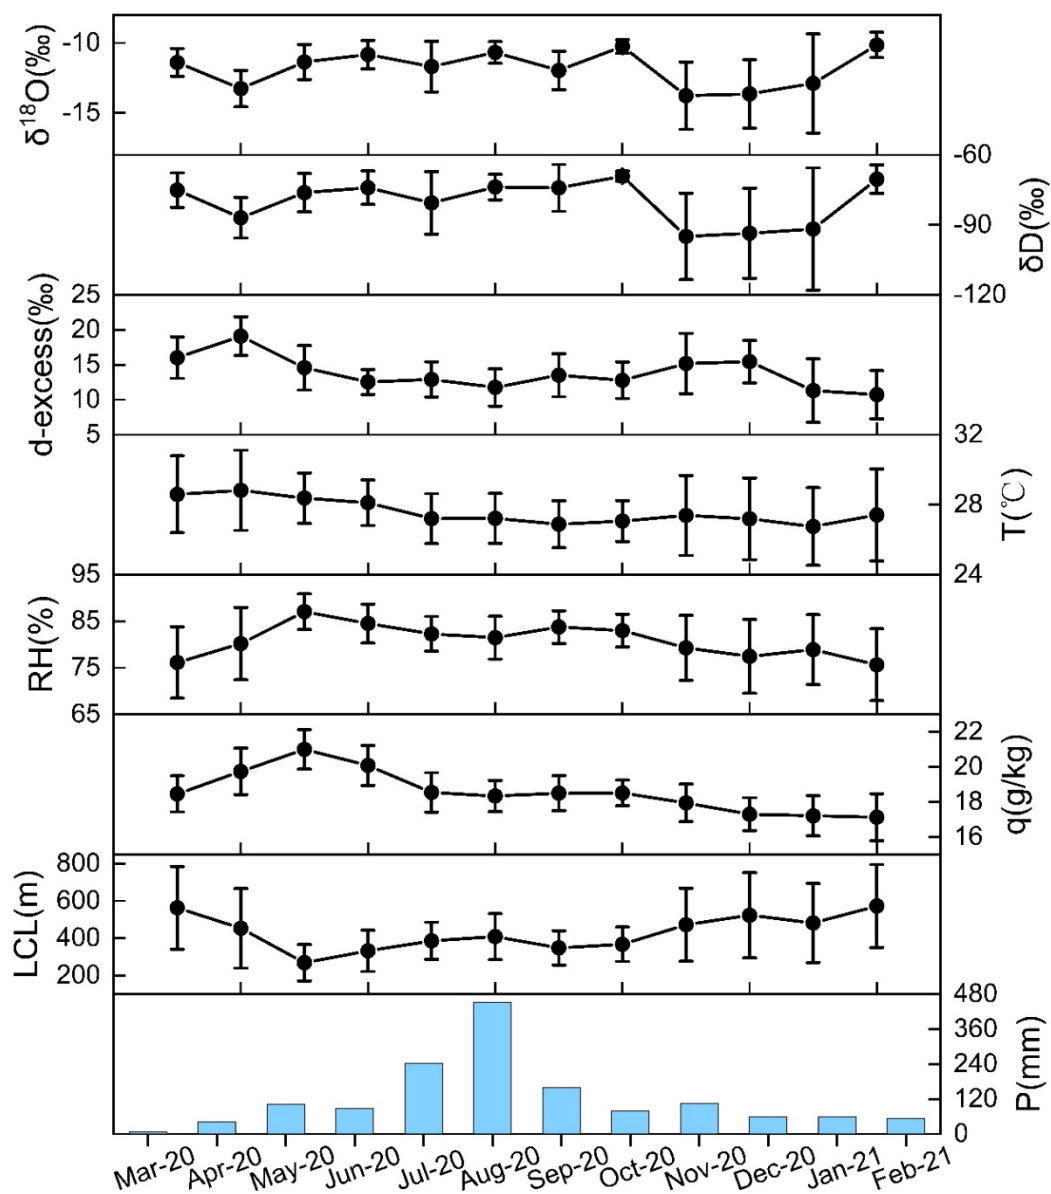

118

119 **Figure S3: Temporal Evolution of Monthly Averages**

120 This figure presents the temporal evolution of monthly averages of atmospheric  
 121 water vapor stable isotopes ( $\delta^{18}\text{O}$ ,  $\delta\text{D}$ , d-excess) alongside co-occurring meteorological  
 122 parameters such as temperature (T), relative humidity (RH), specific humidity (q),  
 123 lifting condensation level (LCL), and precipitation (P).

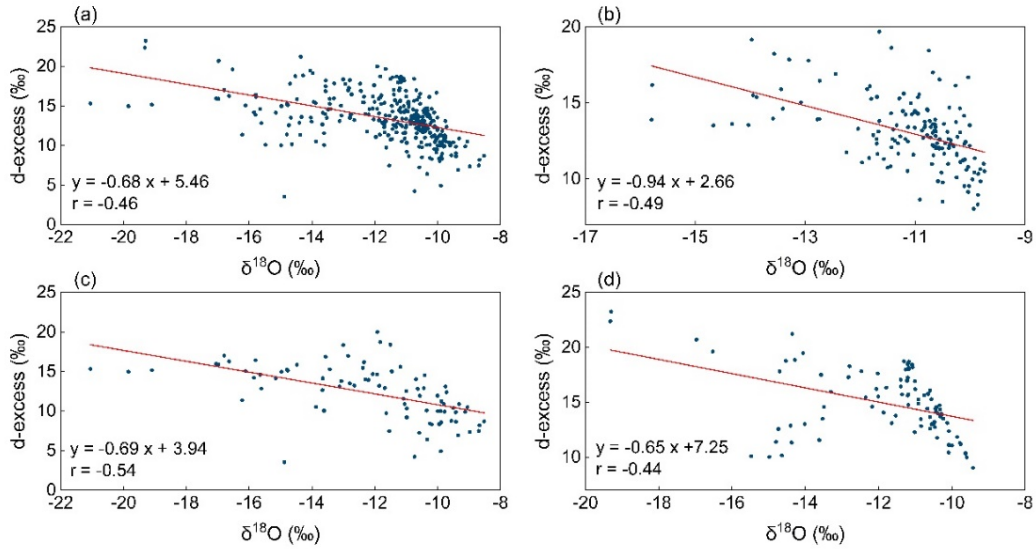

124

125 **Figure S4: Co-variations of Water Vapor Isotopic Composition and d-excess**

126 These subfigures display the co-variations of water vapor  $\delta^{18}\text{O}$  and d-excess  
 127 during the different periods, including the complete period, southwest monsoon,  
 128 northeast monsoon, and non-monsoon seasons. Red lines indicate the least squares  
 129 linear regression, highlighting trends in the data.

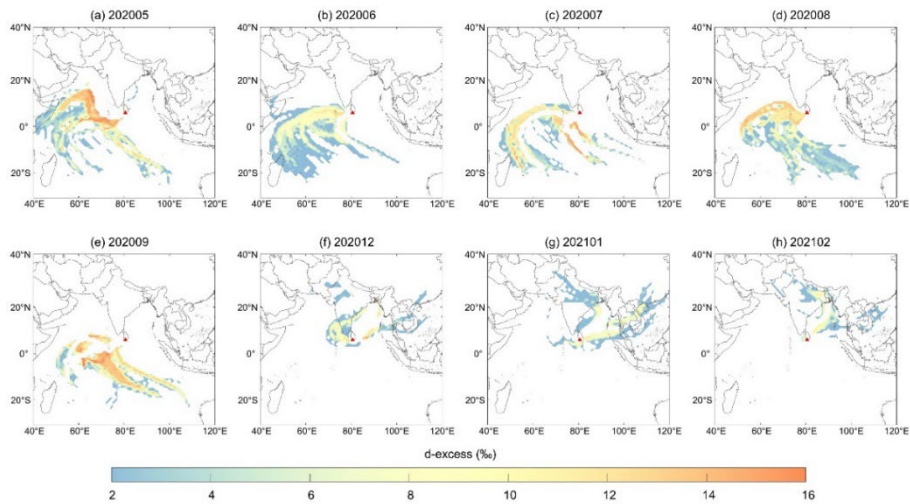

130

131 **Figure S5: Monthly Concentration Fields of d-excess for 168h HYSPLIT Back**  
 132 **Trajectories**

133 These figures show the spatial distribution of d-excess for 168-hour HYSPLIT  
 134 back trajectories during the southwest monsoon and the northeast monsoon. The red  
 135 triangle marks the study site, while the yellow solid line boxes highlight specific regions  
 136 of moisture sources during the two monsoon periods.

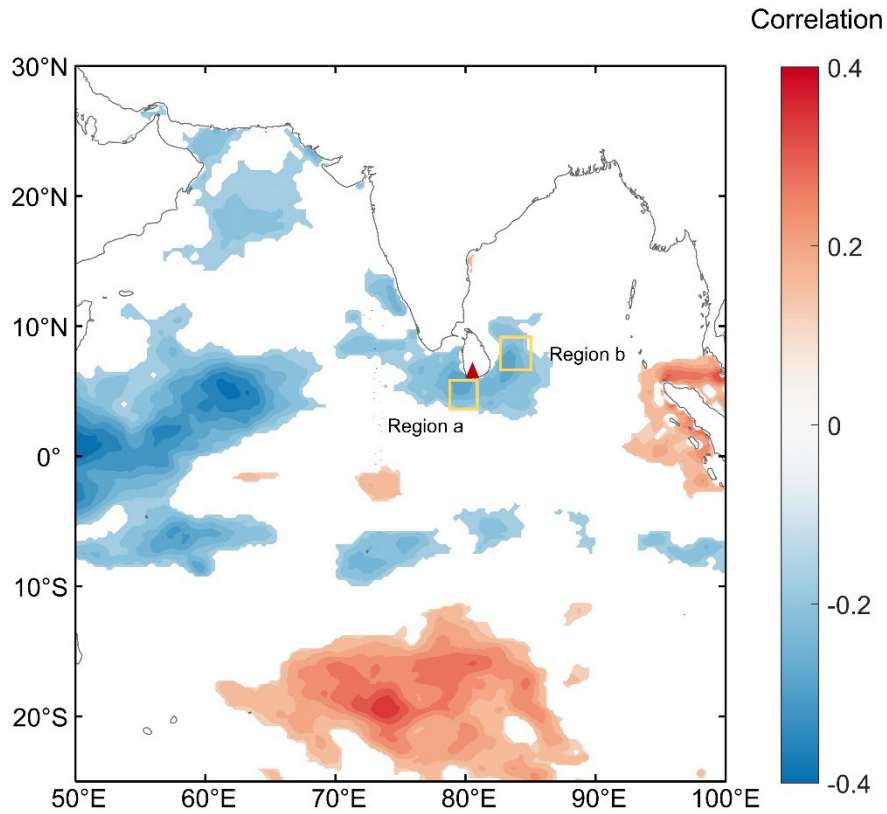

137

138 **Figure S6: Spatial Distribution of Correlation between Water Vapor d-excess and**  
 139 **RH<sub>SST</sub>**

140 This figure illustrates the spatial distribution of the correlation between water  
 141 vapor d-excess observed at the Matara station and RH<sub>SST</sub> (calculated relative to the  
 142 saturation vapor pressure at sea surface temperature) in the surrounding sea area during  
 143 the observation period. The solid red triangle denotes the location of the Matara station.

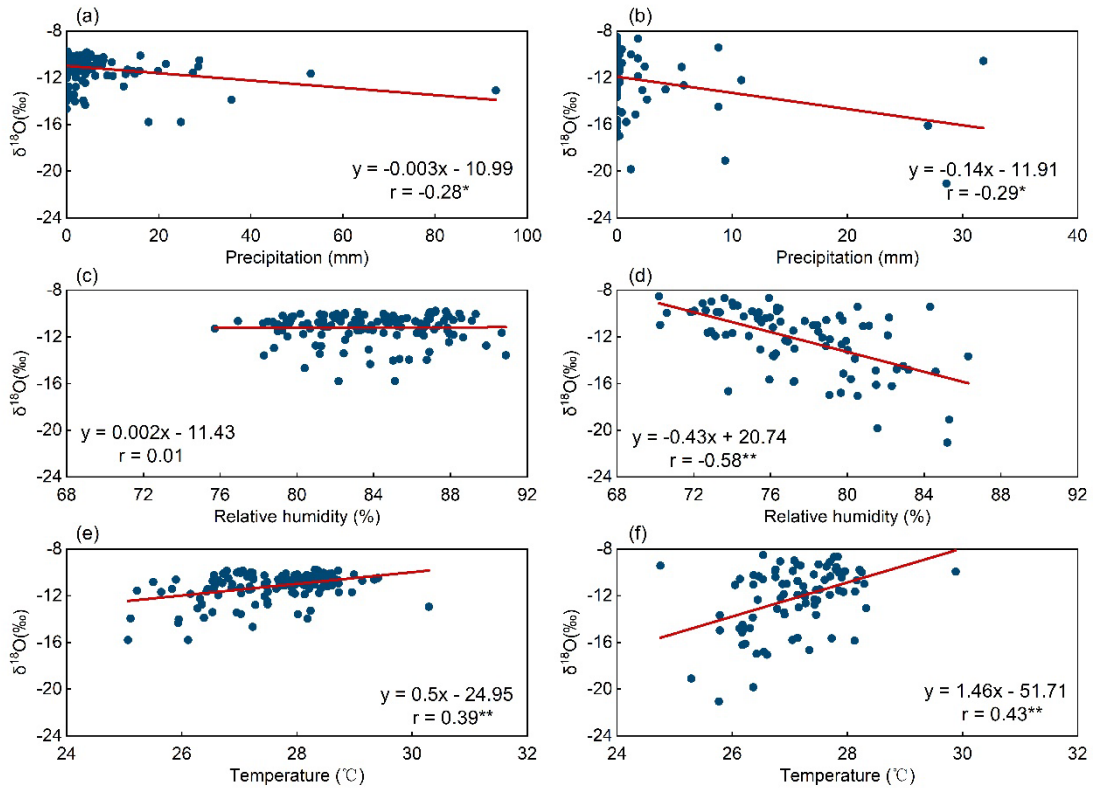

144

145 **Figure S7: Correlation Analysis of Meteorological Parameters and Water Vapor**  
 146 **Isotopic Composition**

147 These subfigures present the results of correlation analyses of  $\delta^{18}\text{O}$  with  
 148 precipitation amount, relative humidity, and 2m air temperature during the southwest  
 149 monsoon and the northeast monsoon. The number of r represents the correlation  
 150 coefficient (\*\* and \* indicate that the correlation coefficients passed the t-test of 0.01  
 151 and 0.05 significant level, respectively).

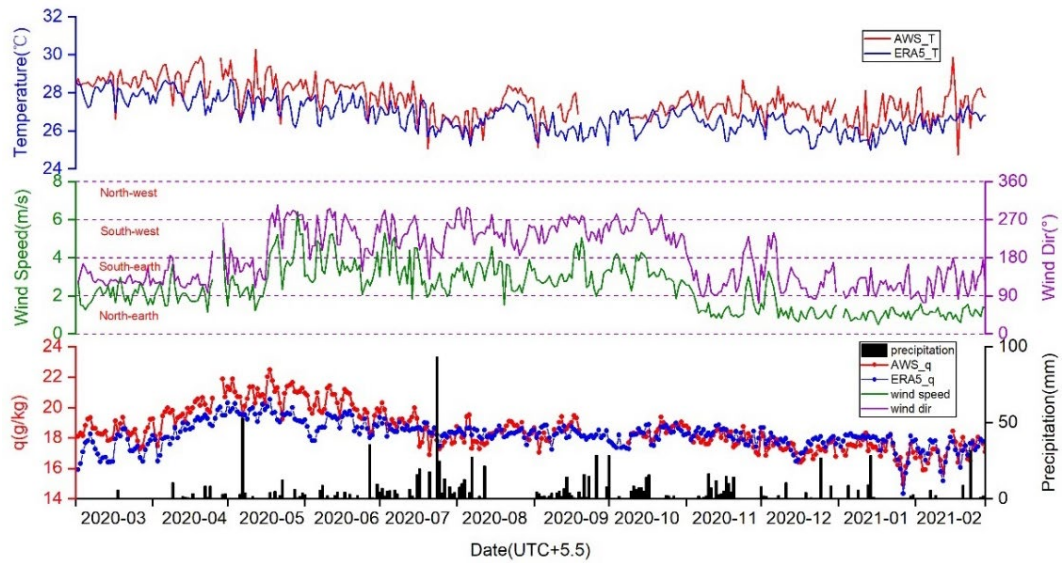

152

153 **Figure S8: Time Series of Meteorological Parameters**

154 This figure shows the time series of temperature (T), specific humidity (q), wind  
 155 speed, wind direction, and daily precipitation observed by AWS (Automated Weather  
 156 Station), as well as simulated temperature and specific humidity from ERA5.

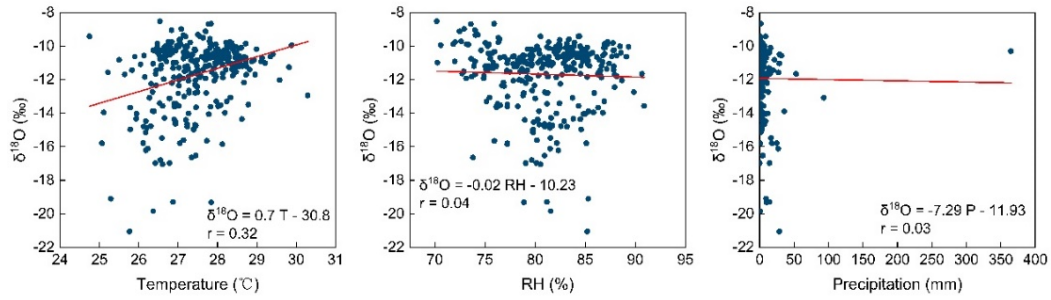

157

158 **Figure S9: Co-variations of Water Vapor Isotopic Composition and Meteorological**

159 **Parameters**

160 These subfigures depict the co-variations of water vapor isotopic composition with

161 meteorological parameters such as temperature (T), relative humidity (RH), and

162 precipitation. Red lines represent the least squares linear regression, providing insights

163 into the relationships between isotopic composition and meteorological variables.

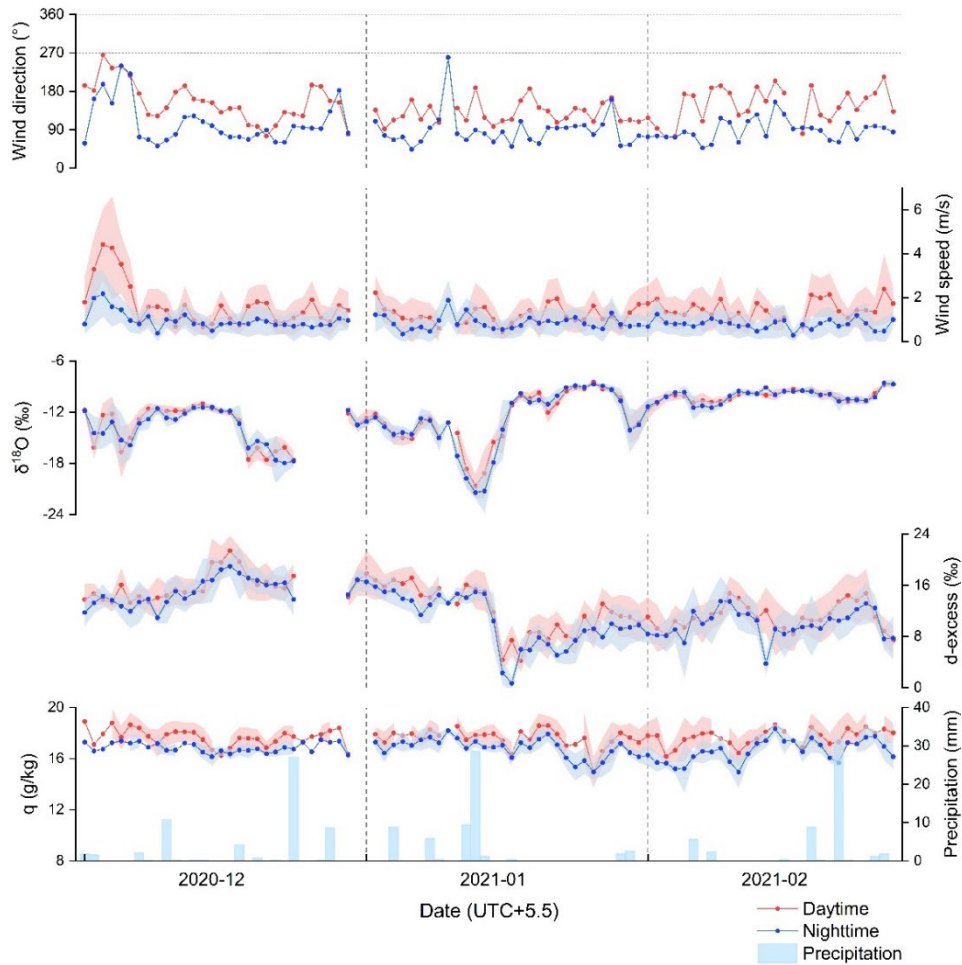

164

165 **Figure S10: Time Series of Daily Precipitation, Isotopic Composition, and**  
 166 **Meteorological Parameters during the Northeast Monsoon**

167 This figure displays the time series of daily precipitation, isotopic composition  
 168 ( $\delta^{18}\text{O}$ , d-excess), specific humidity ( $q$ ), wind speed, and wind direction during the  
 169 northeast monsoon using 12-hour sampling intervals (day-night). Red and blue dotted  
 170 lines represent the daytime and nighttime measurements, respectively, offering a  
 171 comprehensive view of diurnal variations.

172

173

174



**Table S1: Abbreviations of variable names used in this paper.**

| Variable name     | Physical meaning                                        | Unit             |
|-------------------|---------------------------------------------------------|------------------|
| ENSO              | El Niño-Southern Oscillation                            |                  |
| ITCZ              | Intertropical Convergence Zone                          |                  |
| AS                | Arabian Sea                                             |                  |
| BoB               | Bay of Bengal                                           |                  |
| GNIP              | Global Network of Isotopes in Precipitation             |                  |
| ISM               | Indian Summer Monsoon                                   |                  |
| VSMOW             | Vienna Standard Mean Ocean Water                        |                  |
| AWS               | Automated weather station                               |                  |
| BLH               | Atmospheric boundary layer height                       | m                |
| OLR               | Outgoing longwave radiation                             | W/m <sup>2</sup> |
| HYSPLIT           | Hybrid Single-Particle Lagrangian Integrated Trajectory |                  |
| NOAA              | National Oceanic and Atmospheric Administration         |                  |
| GDAS              | Global Data Assimilation System                         |                  |
| CWT               | Concentration-weighted trajectory                       |                  |
| T                 | Temperature                                             | °C               |
| q                 | Specific humidity                                       | g/kg             |
| P                 | Precipitation                                           | mm               |
| RH                | Relative humidity                                       | %                |
| SST               | Sea surface temperature                                 | °C               |
| RH <sub>SST</sub> | Relative humidity of the sea-surface air                | %                |
| LCL               | Lifting condensation level                              | m                |
| SD                | Standard deviation                                      |                  |
| LMWL              | Local Meteoric Water Line                               |                  |
| GMWL              | Global Meteoric Water Line                              |                  |

176 **References**

177 Bailey, A., Noone, D., Berkelhammer, M., Steen-Larsen, H.C., and Sato, P.: The  
178 stability and calibration of water vapor isotope ratio measurements during long-  
179 term deployments, *Atmos. Meas. Tech.*, 8, 4521-4538,  
180 <https://doi.org/10.5194/amt-8-4521-2015>, 2015.

181 Benetti, M., Reverfdin, G., Pierre, C., Merlivat, L., Risi, C., Steen-Larsen, H.C., and  
182 Vimeux, F.: Deuterium excess in marine water vapor: Dependency on relative  
183 humidity and surface wind speed during evaporation, *J. Geophys. Res. Atmos.*,  
184 119, 584-593, <https://doi.org/10.1002/2013JD020535>, 2014.

185 Johnson, L.R., Sharp, Z.D., Galewsky, J., Strong, M., Van Pelt, A.D., Dong, F., and  
186 Noone, D.: Hydrogen isotope correction for laser instrument measurement bias  
187 at low water vapor concentration using conventional isotope analyses:  
188 application to measurements from Mauna Loa Observatory, Hawaii, *Rapid*  
189 *Commun. Mass Sp.*, 25, 608-616, <https://doi.org/10.1002/rcm.4894>, 2011.

190 Rambo, J., Lai, C-T., Farlin, J., Schroeder, M., and Bible, K.: On-Site Calibration for  
191 High Precision Measurements of Water Vapor Isotope Ratios Using Off-Axis  
192 Cavity-Enhanced Absorption Spectroscopy, *J. Atmos. Ocean. Tech.*, 28, 1448-  
193 1457, <https://doi.org/10.1175/JTECH-D-11-00053.1>, 2011.

194 Ritter, F., Steen-Larsen, H.C., Werner, M., Masson-Delmotte, V., Orsi, A., Behrens, M.,  
195 Birnbaum, G., Freitag, J., Risi, C., and Kipfstuhl, S.: Isotopic exchange on the  
196 diurnal scale between near-surface snow and lower atmospheric water vapor at  
197 Kohnen station, East Antarctica, *J. Geophys. Res.*, 10, 1-35,

198 <https://doi.org/10.5194/tc-2016-4>, 2016.

199 Steen-Larsen, H.C., Johnsen, S.J., Masson-Delmotte, V., Stenni, B., Risi, C., Sodemann,  
200 H., Balslev-Clausen, D., Blunier, T., Dahl-Jensen, D., Ellehøj, M.D., Falourd,  
201 S., Grindsted, A., Gkinis, V., Jouzel, J., Popp, T., Sheldon, S., Simonsen, S.B.,  
202 Sjolte, J., Steffensen, J.P., Sperlich, P., Sveinbjörnsdóttir, A.E., Vinther, B.M.,  
203 and White, J.W.C.: Continuous monitoring of summer surface water vapor  
204 isotopic composition above the Greenland Ice Sheet, *Atmos. Chem. Phys.*, 13,  
205 4815-4828, <https://doi.org/10.5194/acp-13-4815-2013>, 2013.

206 Steen-Larsen, H.C., Sveinbjörnsdóttir, A.E., Jonsson, T., Ritter, F., Bonne, J-L.,  
207 Masson-Delmotte, V., Sodemann, H., Blunier, T., Dahl-Jensen, D., and Vinther,  
208 B.M.: Moisture sources and synoptic to seasonal variability of North Atlantic  
209 water vapor isotopic composition, *J. Geophys. Res. Atmos.*, 120, 5757-5774,  
210 <https://doi.org/10.1002/2015JD023234>, 2015.
